# Supplementary material for: Muscle regeneration in dystrophin-deficient mdx mice studied by gene expression profiling
Source: PubMed Central journal article supplement (PMC1190170; doi:10.1186/1471-2164-6-98), 2005-07-13
Supplement: 1471-2164-6-98-S2.pdf [file 1471-2164-6-98-S2.pdf]

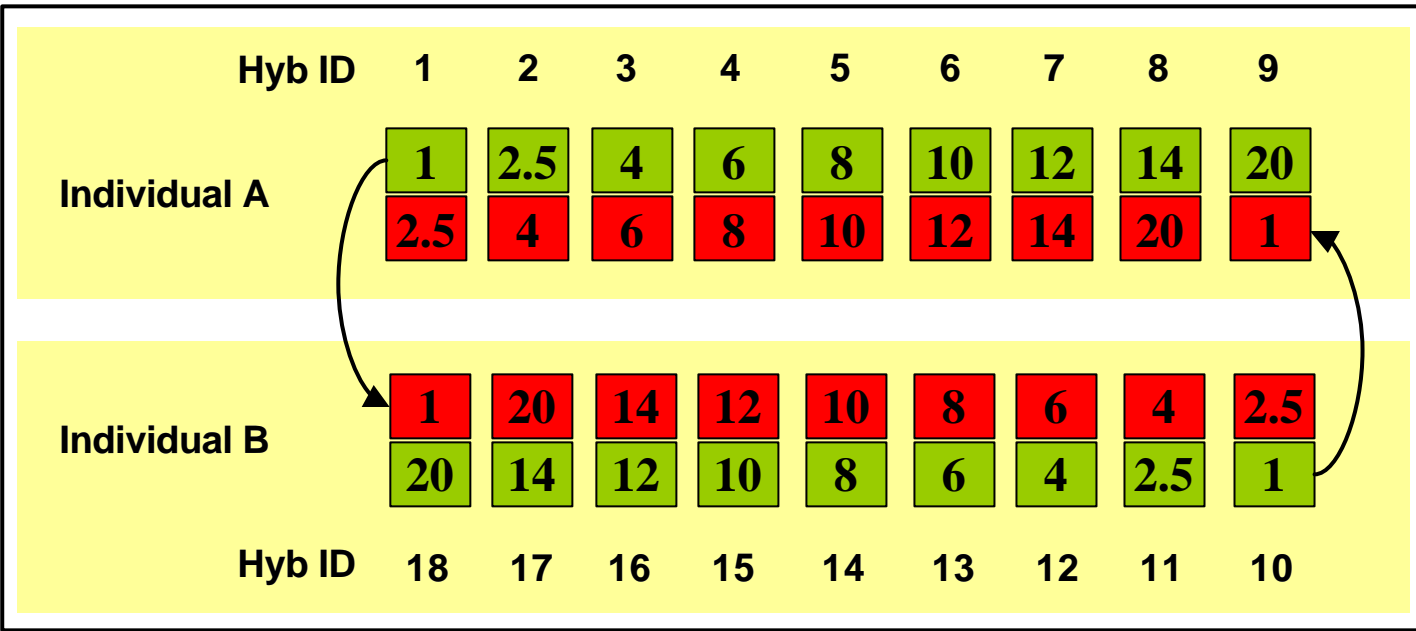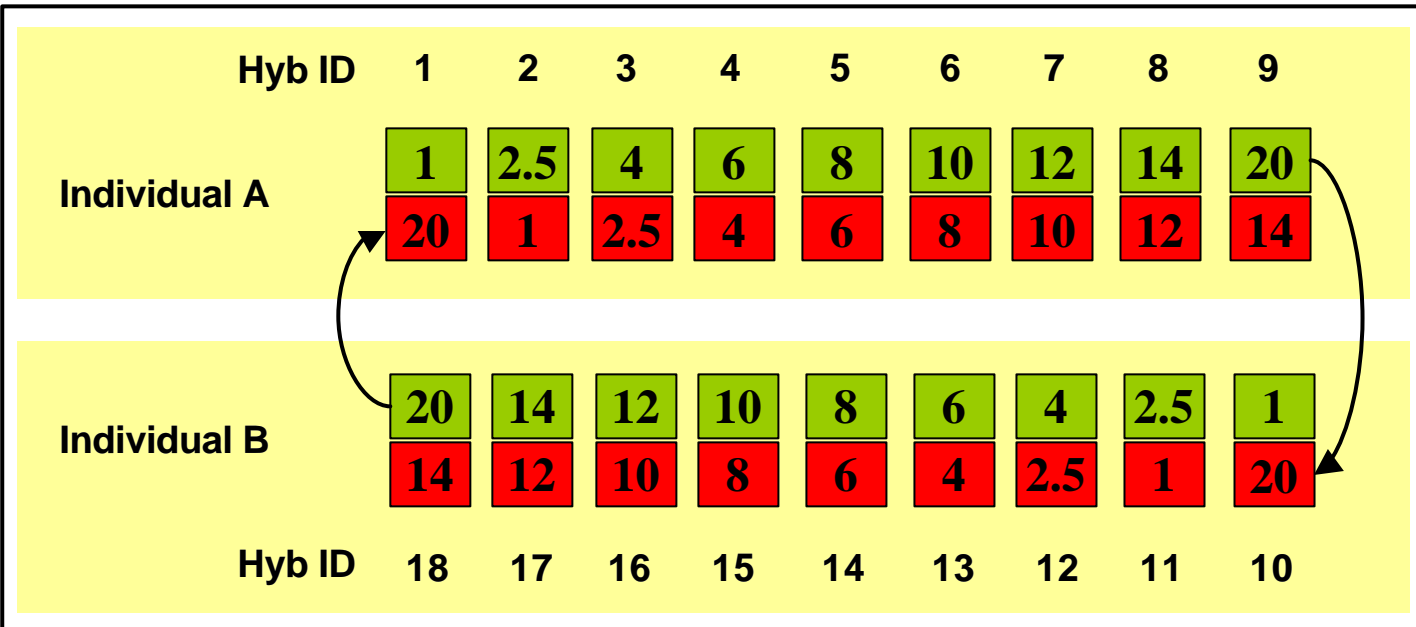

mdx samples

Healthy control samples
